# Supplementary material for: Cryo-electron tomography of cardiac myofibrils reveals a 3D lattice spring within the Z-discs
Source: PubMed Central journal article supplement (PMC7567829; doi:10.1038/s42003-020-01321-5), 2020-10-16
Supplement: 42003_2020_1321_MOESM1_ESM.pdf [file 42003_2020_1321_MOESM1_ESM.pdf]

**Supplementary Information for:**

**Cryo-electron tomography of cardiac myofibrils reveals a 3D  
lattice spring within the Z-discs**

**Authors:** Toshiyuki Oda, and Haruaki Yanagisawa.

Supplementary Figures 1 – 3

Supplementary Movies 1 – 5

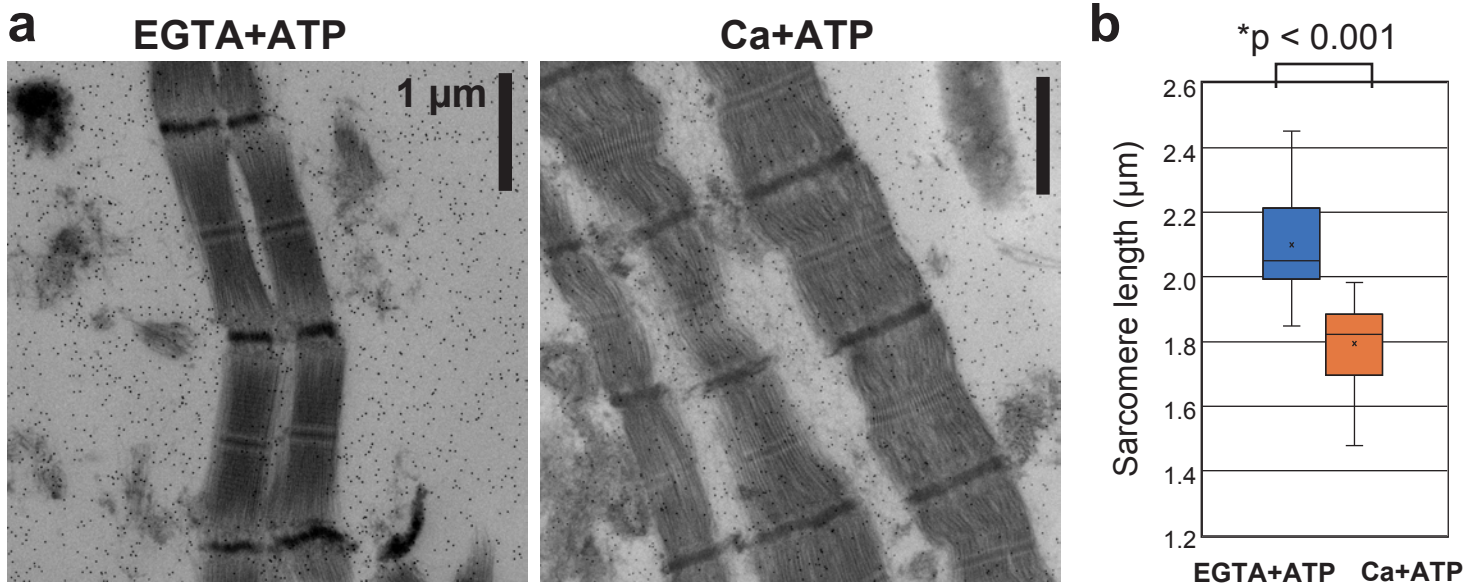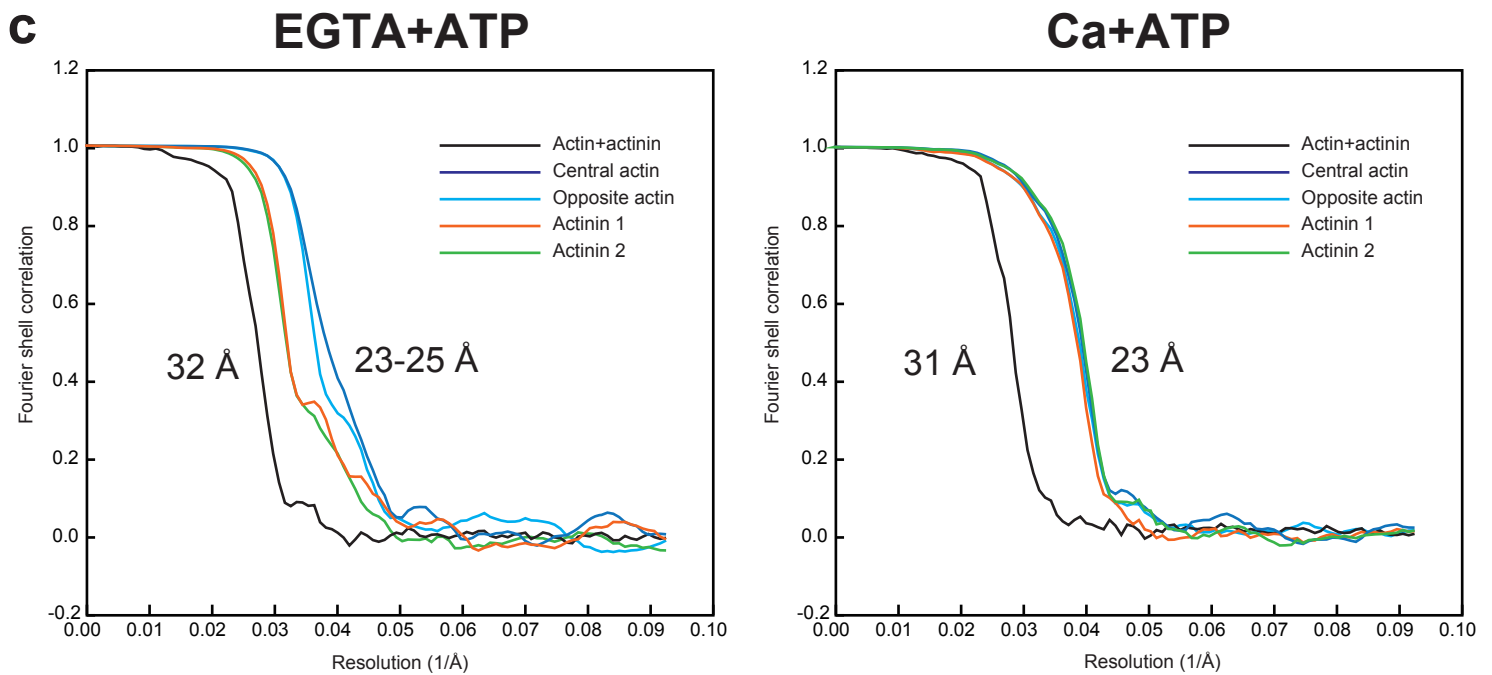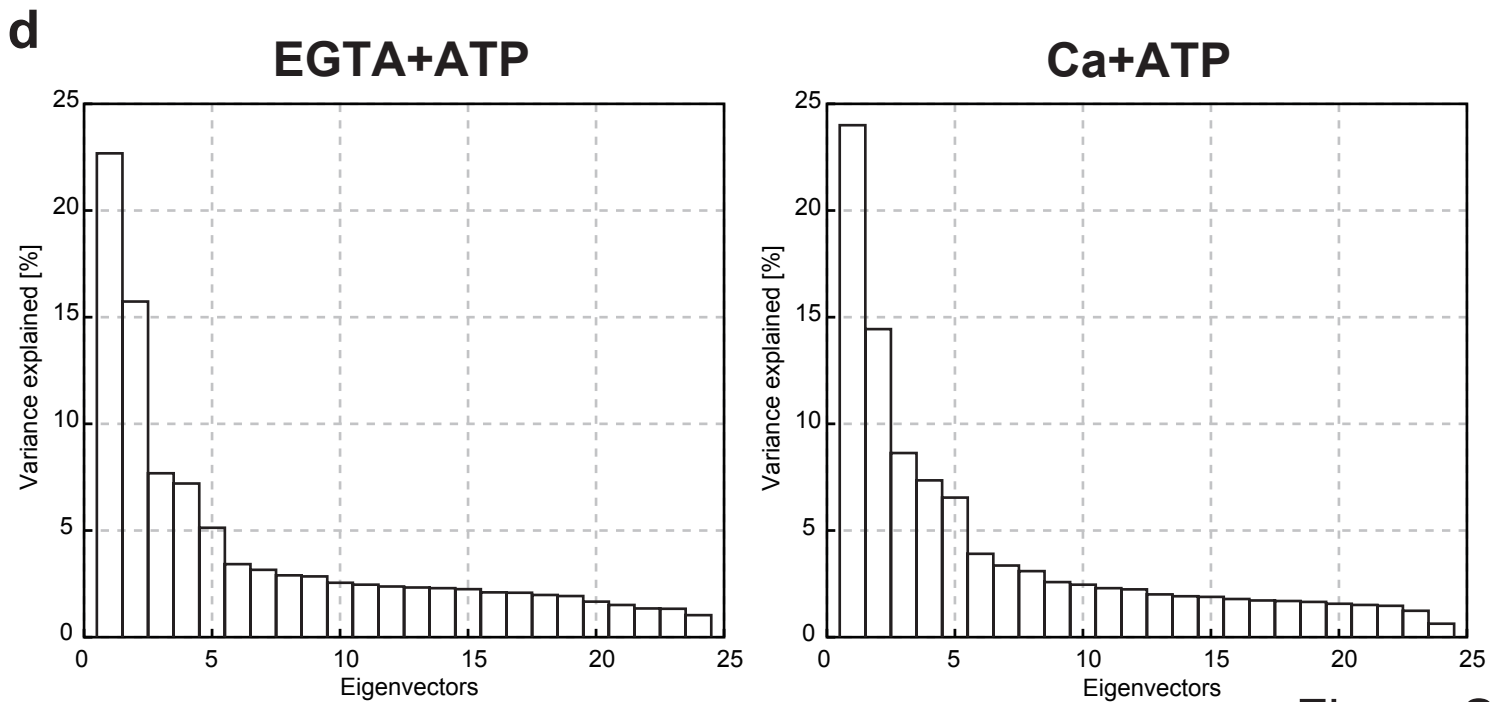

Figure S1

***Supplementary figure 1***

(a) Related to Fig. 1. Longitudinal sections of myofibrils observed by ultra-thin section electron microscopy. Note that we used cross-sections of myofibrils for thin section tomography in Fig.1. (b) Related to Fig. 2. Comparison of the sarcomere lengths between the two ionic states. Sarcomere lengths (Mean  $\pm$  SD, n = 25 for each state) were determined by measuring the distances between the midpoints of the two neighboring Z-discs. The observed length change was similar to the previous study<sup>18</sup>. The asterisk indicates statistical significance ( $p=8.0\times 10^{-10}$ ,  $t=7.4$ , one-sided, Students' t-test). (c) Related to Fig. 4a. Fourier shell correlation plots calculated using Relion-3 post-processing. Resolutions of the averaged tomograms were limited to 31-32 Å (black line, actin+actinin). Multibody refinements improved the resolutions up to 23-25 Å. Opposite actin: the opposite-polarity actin; actinin 1: the  $\alpha$ -actinin molecules in orange that bind to the central F-actin; actinin 2: the  $\alpha$ -actinin molecules in green that bind to the opposite-polarity F-actin. (d) Related to Fig. 4b. Contributions of the eigenvectors to the variance. The first and the second eigenvectors explained nearly 40% of the variance in both states.

**Ca-only**

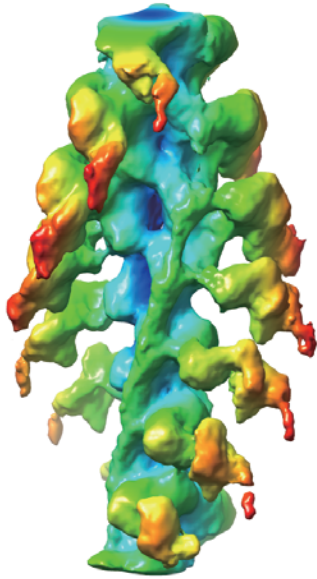

**Ca+ATP**

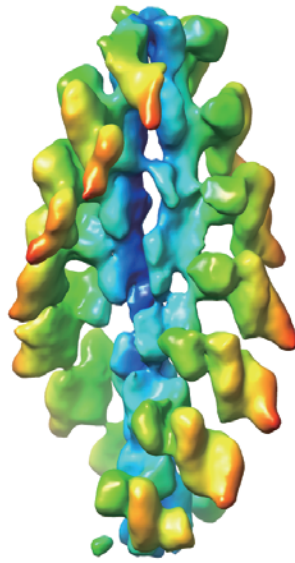

**EGTA+ATP**

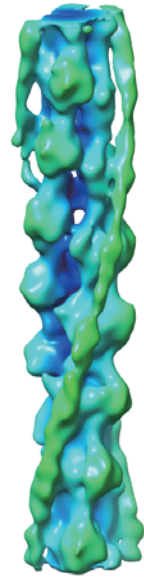

Supplementary Figure 2

***Supplementary Figure 2***

Related to Fig. 2. Averaged subtomograms of the thin filament in the A-band in Ca-only, Ca+ATP, and EGTA+ATP states. In Ca-only state, ATP was omitted from the buffer. The thin filaments were manually picked from the tomograms and subtomograms were averaged using PEET and Relion Refine3D. The numbers of subtomograms averaged were as follows: Ca-only, 3,476; Ca+ATP, 5808; and EGTA+ATP, 3309. No symmetry was imposed and the periodicity of troponin was ignored. The maps were colored according to the distance from the long axis of the filament. Both in Ca-only and Ca+ATP states, the thin filaments were decorated with the myosin heads, which were dissociated in EGTA+ATP state. In the Ca+ATP state, the thin filament region was not clearly visualized, especially the tropomyosin densities were unclear, probably due to the structural heterogeneity between the actively-moving myosin heads and the thin filament.

**EGTA+ATP**

**Ca+ATP**

Ultra-thin section tomography

4 tomograms  
450 subtomograms

5 tomograms  
538 subtomograms

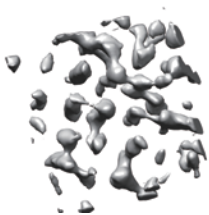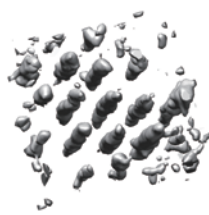

Initial references for cryo-tomography

43 tomograms  
12,925 subtomograms

43 tomograms  
16,685 subtomograms

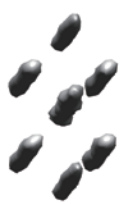

21.36 Å/pixel

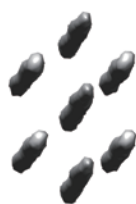

PEET

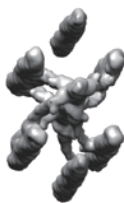

10.68 Å/pixel

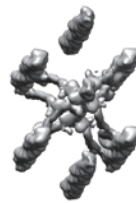

PEET

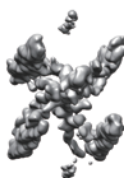

5.34 Å/pixel

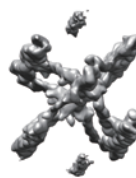

Relion

8,854 subtomograms after  
duplicates removal

12,535 subtomograms after  
duplicates removal

Multibody refinement

Masks

Bodies

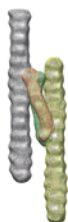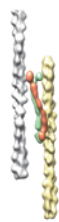

Masks

Bodies

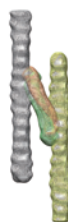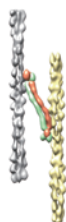

**Supplementary Figure 3**

Summary of the reconstruction scheme.
